# Supplementary material
Source: PubMed Central journal article supplement (PMC3563867)
Supplement: NIHMS428480-supplement-1.pdf [file NIHMS428480-supplement-1.pdf]

## Supplementary Figure S1

**A**

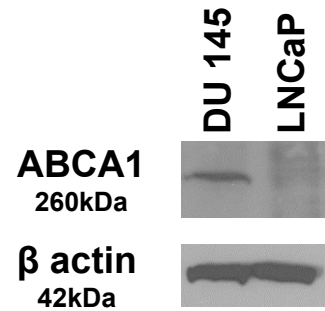

**B**

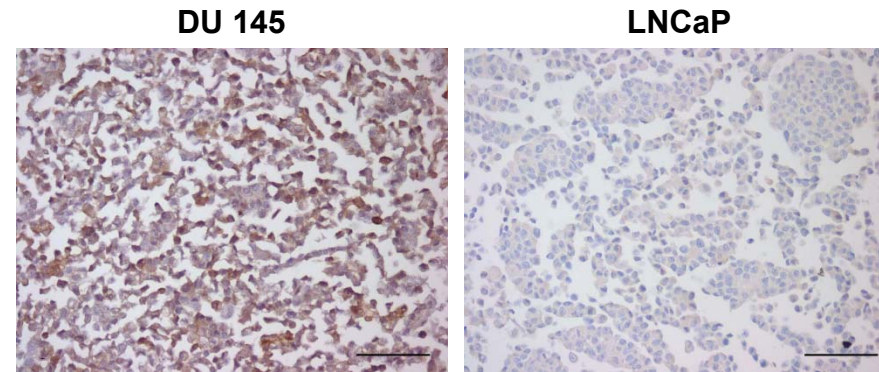

**Supplementary Figure S1. Validation of custom rabbit anti-ABCA1 antibody.** (A) Western blotting of DU 145 and LNCaP cells using the custom rabbit anti-ABCA1 antibody and commercial mouse anti-ACTB ( $\beta$ -actin) as loading control. (B) Immunohistochemistry of DU 145 and LNCaP cell blocks using the custom rabbit anti-ABCA1 antibody. Cells were formalin fixed and paraffin embedded for sectioning and staining. The scale bar represents 0.1 mm.

## Supplementary Figure S2

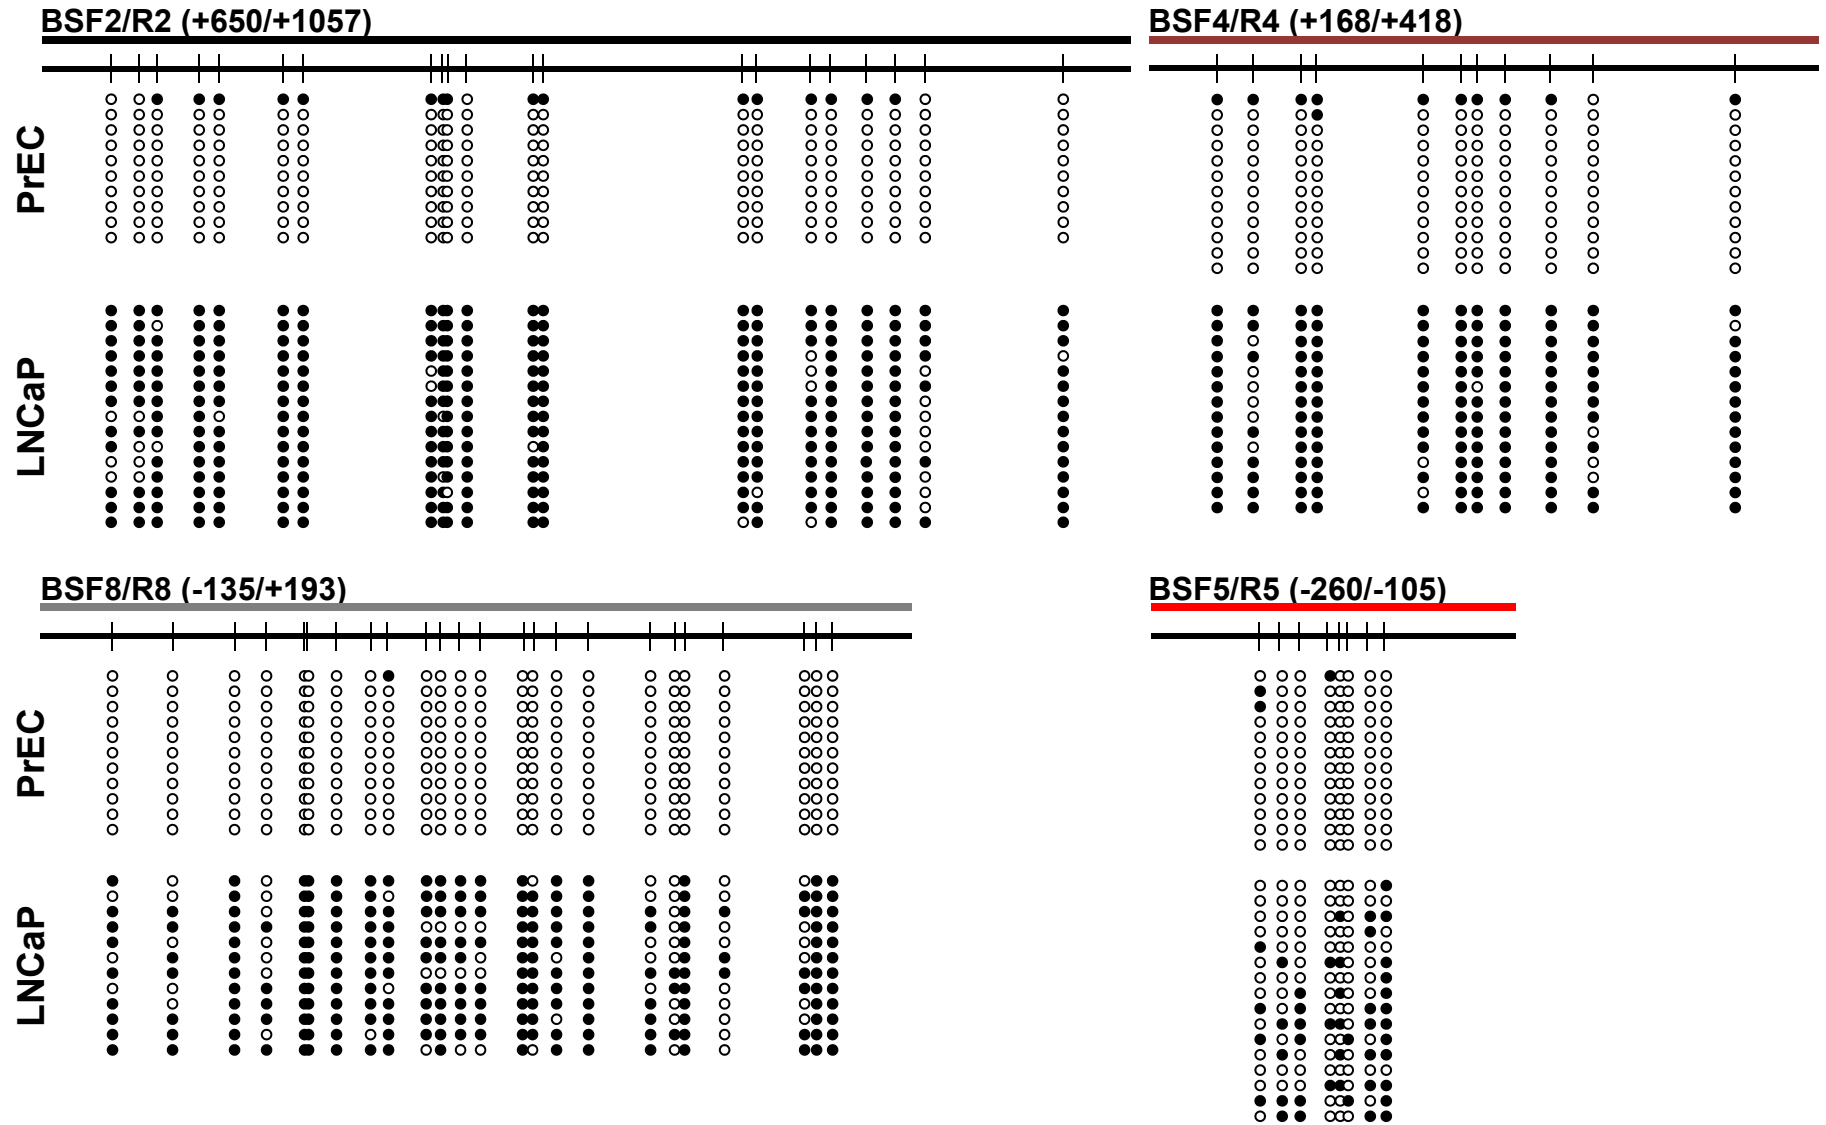

**Supplementary Figure S2.** Additional *ABCA1* bisulfite sequencing validation in PrEC and LNCaP cells. Black circles represent methylated CpG sites, and white circles represent unmethylated CpG sites.

# Supplementary Figure S3

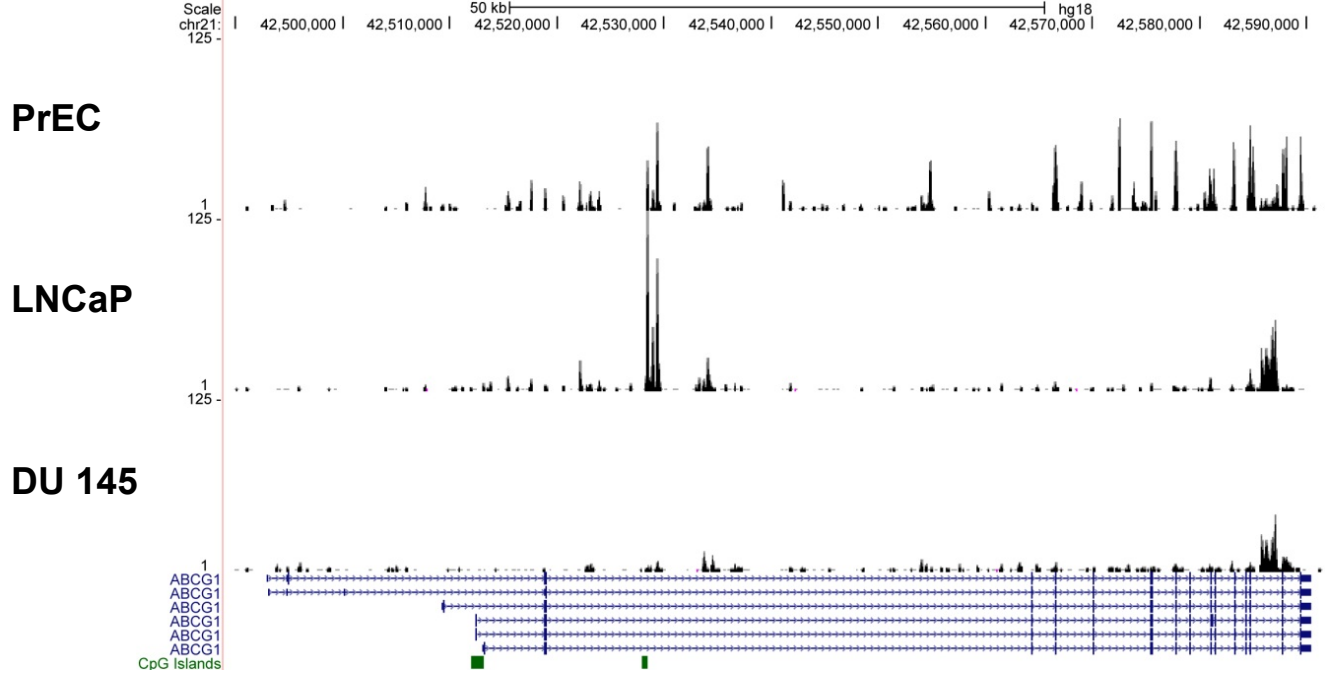

**Supplementary Figure S3. DNA methylation patterns at the *ABCG1* locus.** UCSC genome browser snapshot displaying the DNA methylation sequencing signals in PrEC, LNCaP, and DU 145 cells at the *ABCG1* locus (UCSC Hg18, chr21:42,489,000-42,592,000).
