# Supplementary material
Source: PubMed Central journal article supplement (PMC3563867)
Supplement: NIHMS428480-supplement-2.pdf [file NIHMS428480-supplement-2.pdf]

**Supplementary Table S1. Primer information**

| <b>Primer name</b>                  | <b>Sequence</b>                 | <b>Size (bp)</b> | <b>T<sub>m</sub> (°C)</b> |
|-------------------------------------|---------------------------------|------------------|---------------------------|
| <b>Bisulfite sequencing primers</b> |                                 |                  |                           |
| ABCA1 BSF1                          | GGTTAGAATAGATTAGTTTTTTAAGAAT    | 310              | 57                        |
| ABCA1 BSR1                          | AACTCTAATAACCCCAAACCTCTAC       |                  |                           |
| ABCA1 BSF2                          | ATTTAGGAGGTTGAGGTAGGAGAAT       | 408              | 60                        |
| ABCA1 BSR2                          | AAATACCAACACTAAATCTTCACTC       |                  |                           |
| ABCA1 BSF3                          | GAGGGAGGATTGGGTATTTTATTT        | 181              | 60                        |
| ABCA1 BSR3                          | TTCAACTTATTAACCAAACCTAATCTC     |                  |                           |
| ABCA1 BSF4                          | GTAGAGTTTTGGGGTTATTAGAGTT       | 251              | 50                        |
| ABCA1 BSR4                          | AAAAACTTATCAAAAAATAAAAAAAA      |                  |                           |
| ABCA1 BSF5                          | GGTTTTTGTTTATGTAGTTTAGTTATTAG   | 156              | 60                        |
| ABCA1 BSR5                          | AACCCTAAAACACCTACTATACCCTC      |                  |                           |
| ABCA1 BSF6                          | AGGGTATAGTAGGTGTTTTAGGGTT       | 169              | 60                        |
| ABCA1 BSR6                          | CAAAATTTAAAAAAAACAAATTCCACTA    |                  |                           |
| ABCA1 BSF8                          | TTTTTTTTATTTTTTGATAAGTTTTT      | 327              | 50                        |
| ABCA1 BSR8                          | CTAAATAACTAACTACATAAACAAAAAC    |                  |                           |
| <b>MSP primers</b>                  |                                 |                  |                           |
| ABCA1 M F1                          | TATTAGAGTTCGTATTAGGATATCGT      | 159              | 50                        |
| ABCA1 M R1                          | CTTAAACGTTATTATTTTATTTTCGAA     |                  |                           |
| ABCA1 U F1                          | GGTTATTAGAGTTTGTATTAGGATATTGT   | 170              | 50                        |
| ABCA1 U R1                          | ATAACTTACTTAAACATTATTATTTTATTTC |                  |                           |
| ABCA1 M F2                          | ATAAGGAGTAAAGCGTTTTGAGAATC      | 129              | 50                        |
| ABCA1 M R2                          | TACGAACGAAAATAAATAAAACCGAA      |                  |                           |
| ABCA1 U F2                          | AAGGAGTAAAGTGTTTTGAGAATTGG      | 127              | 50                        |
| ABCA1 U R2                          | TACAAACAAAAATAAATAAAACCAAA      |                  |                           |
| ABCA1 M F3                          | TAGAAAGTACGTGGAGTCGGG           | 148              | 58                        |
| ABCA1 M R3                          | AAAAAAAAAAACGCAAACCGCGAA        |                  |                           |
| ABCA1 U F3                          | TAGAAAGTATGTGGAGTTGGGG          | 140              | 58                        |
| ABCA1 U R3                          | ACACAAACCACAAACCCTAAAACA        |                  |                           |
| ABCA1 M F4                          | GGGTTTCGTTCGGTTTAAGACG          | 100              | 58                        |
| ABCA1 M R4                          | AAATTCCTACTAATACCCTTAACTACCGAA  |                  |                           |
| ABCA1 U F4                          | GGGTTTGTTGGTTTAAGATG            | 103              | 58                        |
| ABCA1 U R4                          | AACAAATTCCTACTAATACCCTTAACTACCA |                  |                           |
| <b>qRT-PCR primers</b>              |                                 |                  |                           |
| ABCA1 qRT F                         | GGA CTCTGGCC CAGGAGCTGT         | 143              | 60                        |
| ABCA1 qRT R                         | CTCGGGATGCCCGCAGACAA            |                  |                           |
| GAPDH qRT F                         | GAAGGTCGGAGTCAACGGATTT          | 148              | 55                        |
| GAPDH qRT R                         | ATGGGTGGAATCATATTGGAA           |                  |                           |

**Supplementary Table S2. *ABCG1* and *ABCA1* gene expression**

| Comparison       | <i>ABCG1</i> |                  | <i>ABCA1</i> |                  |
|------------------|--------------|------------------|--------------|------------------|
|                  | Fold change  | Adjusted p-value | Fold change  | Adjusted p-value |
| LNCaP vs. PrEC   | 1.0157       | 0.850            | 0.1220       | 0                |
| DU 145 vs. PrEC  | 0.9966       | 0.971            | 0.5332       | 0.004            |
| DU 145 vs. LNCaP | 0.9811       | 0.802            | 4.3692       | 0                |
